# Supplementary material for: Monitoring GPCR conformation with GFP-inspired dyes
Source: PubMed Central journal article supplement — iScience. 2024 Jul 4;27(8):110466. doi: 10.1016/j.isci.2024.110466 (PMC11326922; doi:10.1016/j.isci.2024.110466), 2024-07-04
Supplement: mmc1.pdf [file mmc1.pdf]

## Supplemental information

### Monitoring GPCR conformation with GFP-inspired dyes

Anatoliy Belousov, Ivan Maslov, Philipp Orekhov, Polina Khorn, Pavel Kuzmichev, Nadezhda Baleeva, Vladislav Motov, Andrey Bogorodskiy, Svetlana Krasnova, Konstantin Mineev, Dmitry Zinchenko, Evgeni Zernii, Valentin Ivanovich, Sergei Permyakov, Johan Hofkens, Jelle Hendrix, Vadim Cherezov, Thomas Gensch, Alexander Mishin, Mikhail Baranov, Alexey Mishin, and Valentin Borshchevskiy

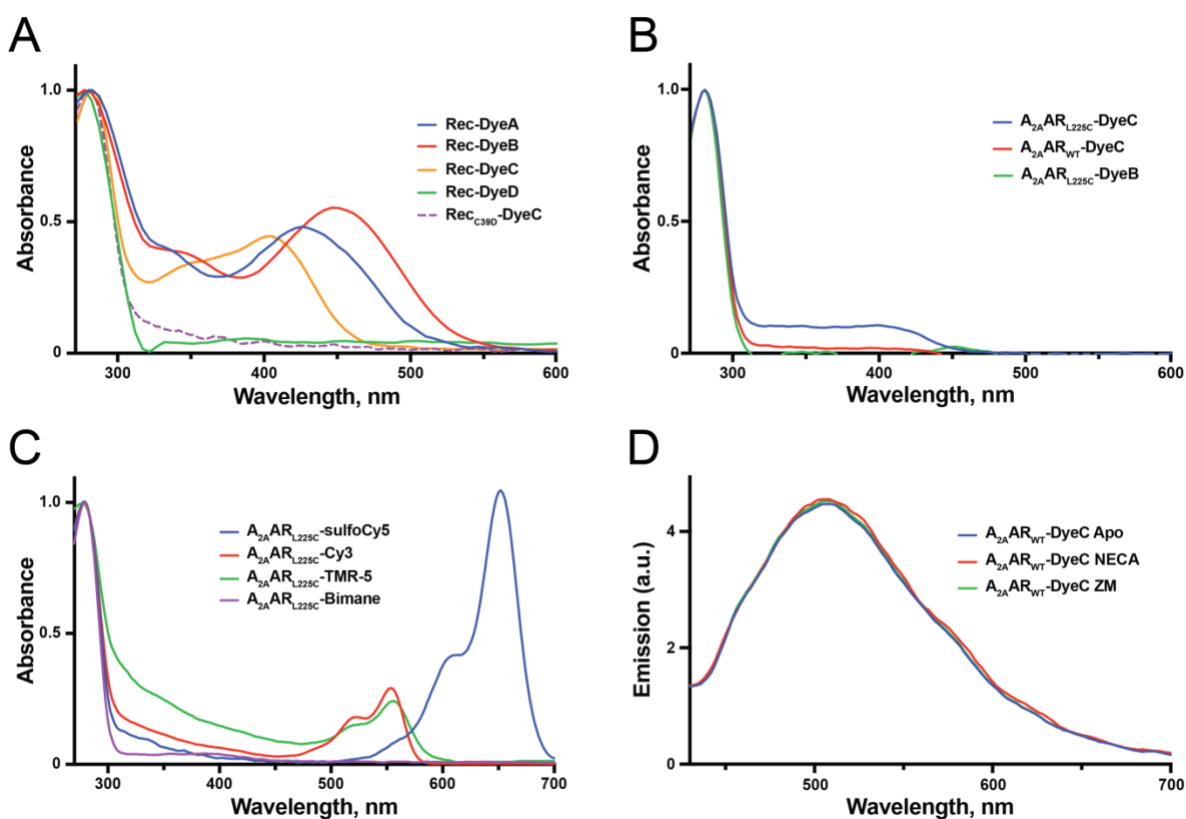

**Figure S1. Absorbance spectra of labeled Rec and  $A_{2A}AR$ , and fluorescence emission spectra of  $A_{2A}AR_{WT}$  labeled with DyeC, related to Figures 2-3.**

**A:** Absorbance spectra of Rec labeled with synthesized GFP-inspired fluorophores. Rec<sub>C39D</sub>-DyeC is used as a control for labeling specificity. Labeling efficiencies are ~ 90 %, 100 %, 85 %, and <5 % for Rec with DyeA, DyeB, DyeC, and DyeD, respectively, and <5 % for Rec<sub>C39D</sub>. **B:** Absorbance spectra of  $A_{2A}AR_{L225C}$  labeled with DyeC and DyeB.  $A_{2A}AR_{WT}$ -DyeC is used as a control for labeling specificity. Labeling efficiencies are <5 % and ~ 80 % for  $A_{2A}AR_{L225C}$  with DyeB and DyeC, respectively, and <10 % for  $A_{2A}AR_{WT}$ -DyeC. **C:** Absorbance spectra of  $A_{2A}AR_{L225C}$  labeled with sulfo-Cy5, Cy3, TMR-5, and Bimane. Labeling efficiencies are ~40%, ~25%, ~30%, and ~66% for  $A_{2A}AR_{L225C}$  with sulfo-Cy5, Cy3, TMR-5, and Bimane, respectively. The absorption spectra **A**, **B**, **C** are normalized by the protein absorption maximum (280 nm). **D:** Fluorescence emission spectra of  $A_{2A}AR_{WT}$ -DyeC with added ligands.  $A_{2A}AR_{WT}$ -DyeC shows no response to the agonist NECA as opposed to  $A_{2A}AR_{L225C}$ -DyeC. This result suggests that there is no contribution to the change in  $A_{2A}AR_{L225C}$ -DyeC emission from nonspecific labeling. Excitation wavelength was 410 nm.

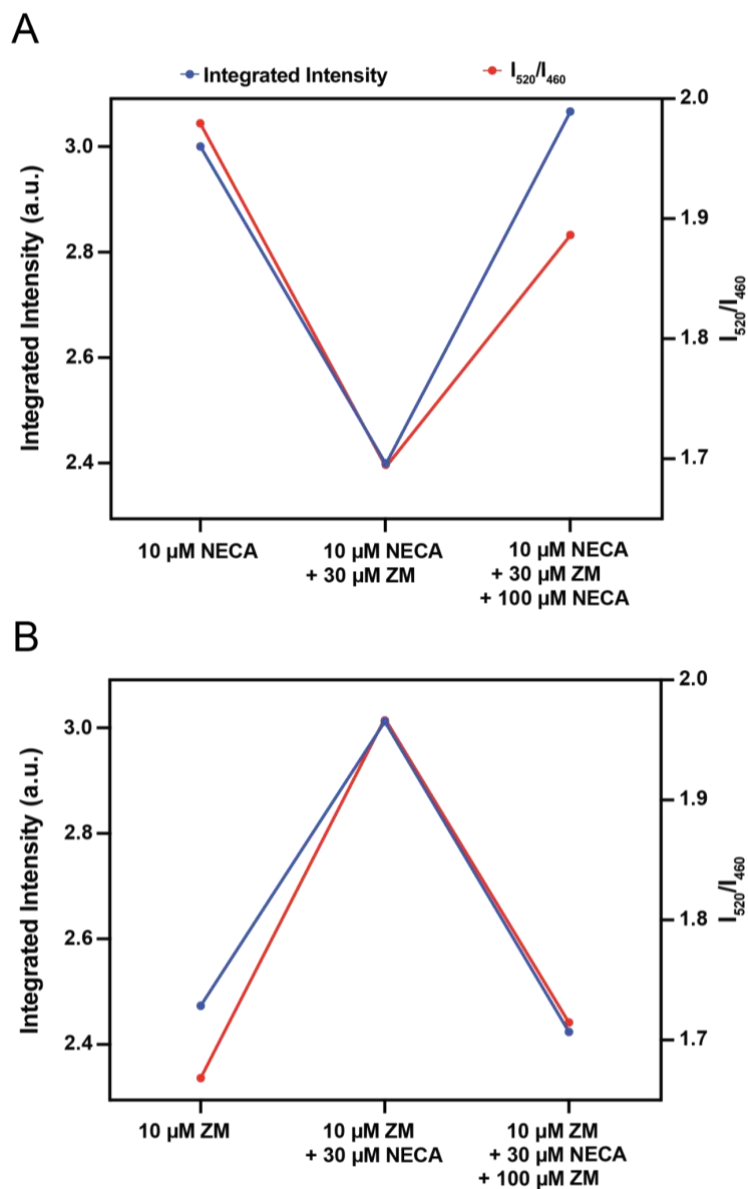

**Figure S2. Displacement of ligands in  $A_{2A}AR_{L225C}$ -DyeC, related to Figure 3.**

Two experiments were performed. In the first experiment (A), 10  $\mu$ M NECA was added initially, followed by the addition of 30  $\mu$ M ZM241385, and finally NECA was added again to a final concentration of 110  $\mu$ M. In the second experiment (B), 10  $\mu$ M ZM241385 was added initially, followed by the addition of 30  $\mu$ M NECA, and finally ZM241385 was added again to a final concentration of 110  $\mu$ M. Protein concentration was 2  $\mu$ M. Excitation wavelength was 410 nm.

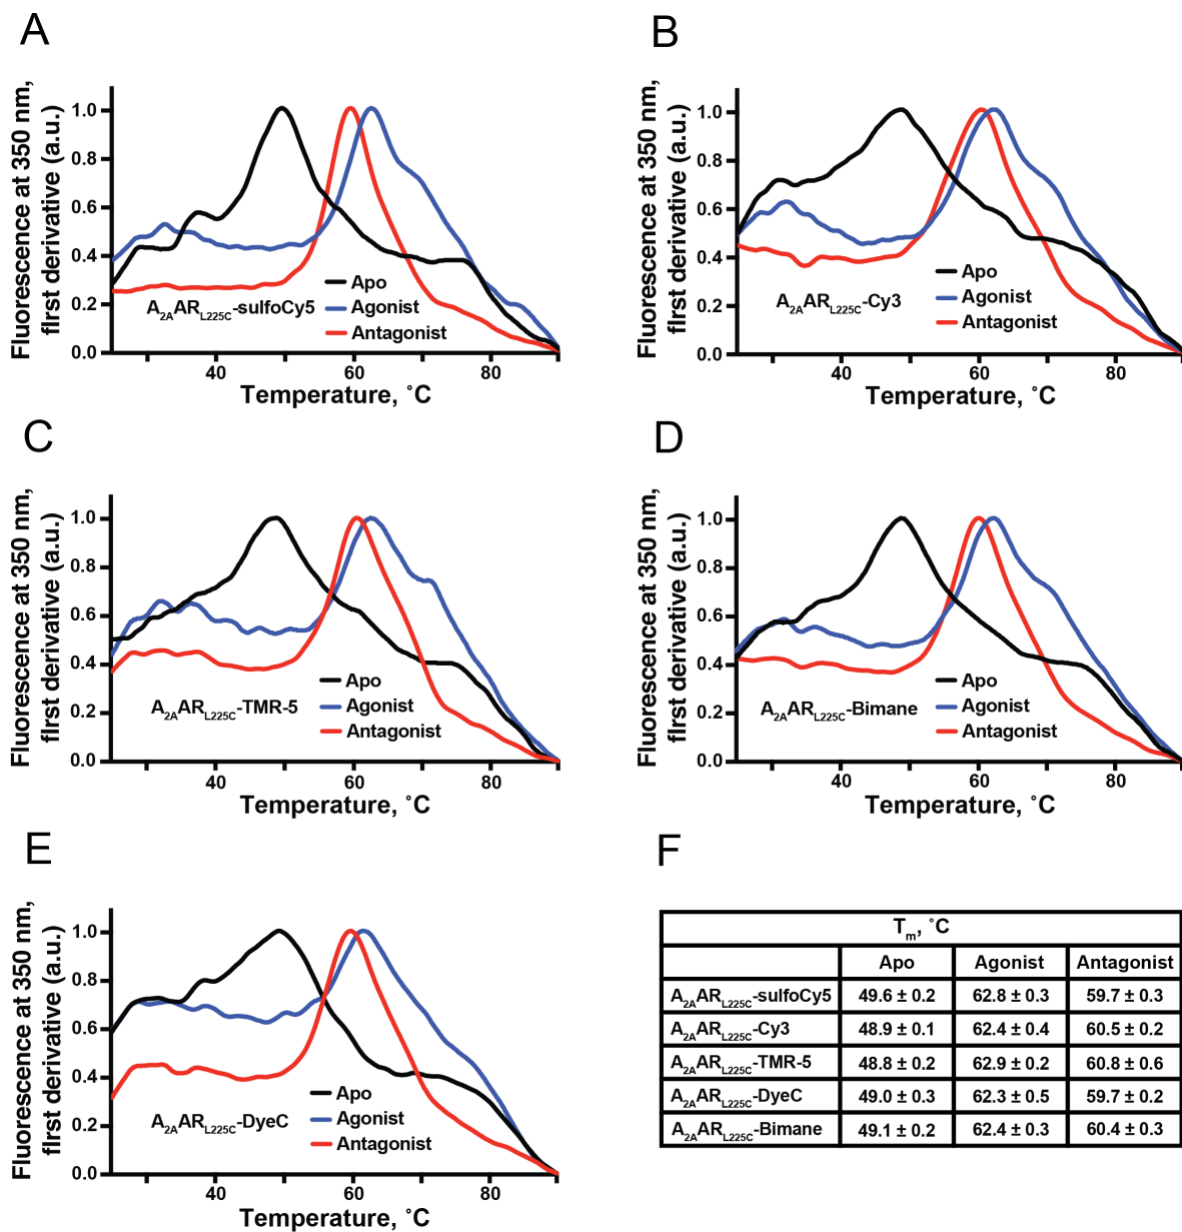

**Figure S3. Normalized first derivatives of nanoDSF fluorescence curves at 350 nm of  $A_{2A}AR_{L225C}$  labeled with various dyes in the apo and ligand-bound states, related to Figure 3. A-E:** Thermal stability of  $A_{2A}AR_{L225C}$  labeled with sulfo-Cy5 (A), Cy3 (B), TMR-5 (C), Bimane (D) or DyeC (E) increases upon addition of agonist (NECA or adenosine), or antagonist ZM241385 compared to its apo state, regardless of the dye used. **F:** Melting temperatures,  $T_m$ , were determined as the positions of the maxima of the first derivatives of nanoDSF fluorescence curves (mean ± SD for three technical replicas). Excitation wavelength was 280 nm. All samples were purified from the same batch of cells.

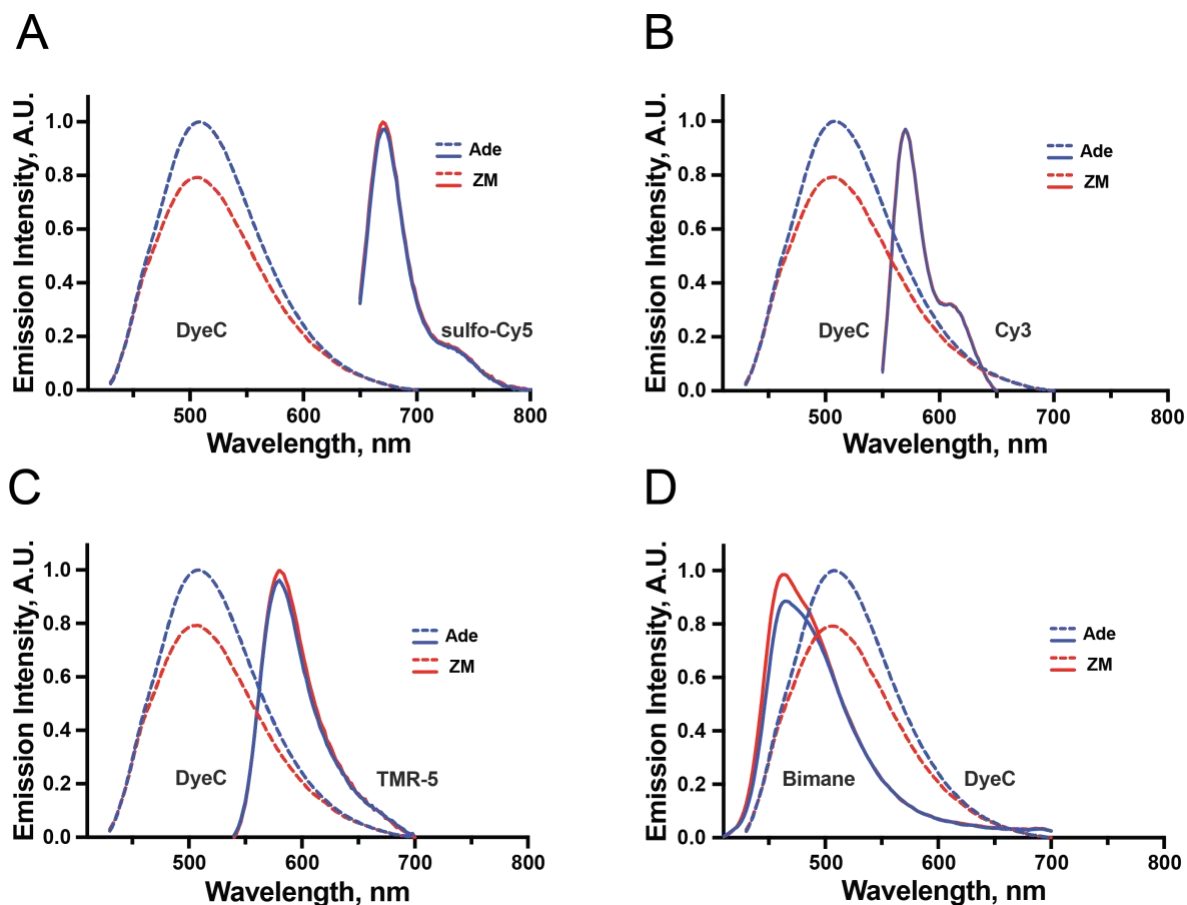

**Figure S4. Fluorescence emission spectra of  $A_{2A}AR_{L225C}$  labeled with sulfo-Cy5, Cy3, TMR-5, and Bimane and bound with various ligands, related to Figure 3.**

Fluorescence emission spectra of sulfo-Cy5 (A), Cy3 (B), and TMR-5 (C) attached to the  $A_{2A}AR_{L225C}$  showed no response to the agonist adenosine and antagonist ZM241385. The results suggest that these labels cannot be used as reporters of conformational changes in  $A_{2A}AR$ . Bimane (D) showed changes in emission spectra, although approximately half as pronounced as those observed with DyeC. DyeC spectra are shown for comparison. All samples were purified from the same batch of cells. Excitation wavelength was 630 nm for **A**, 530 nm for **B**, 520 nm for **C**, and 390 nm for **D**.

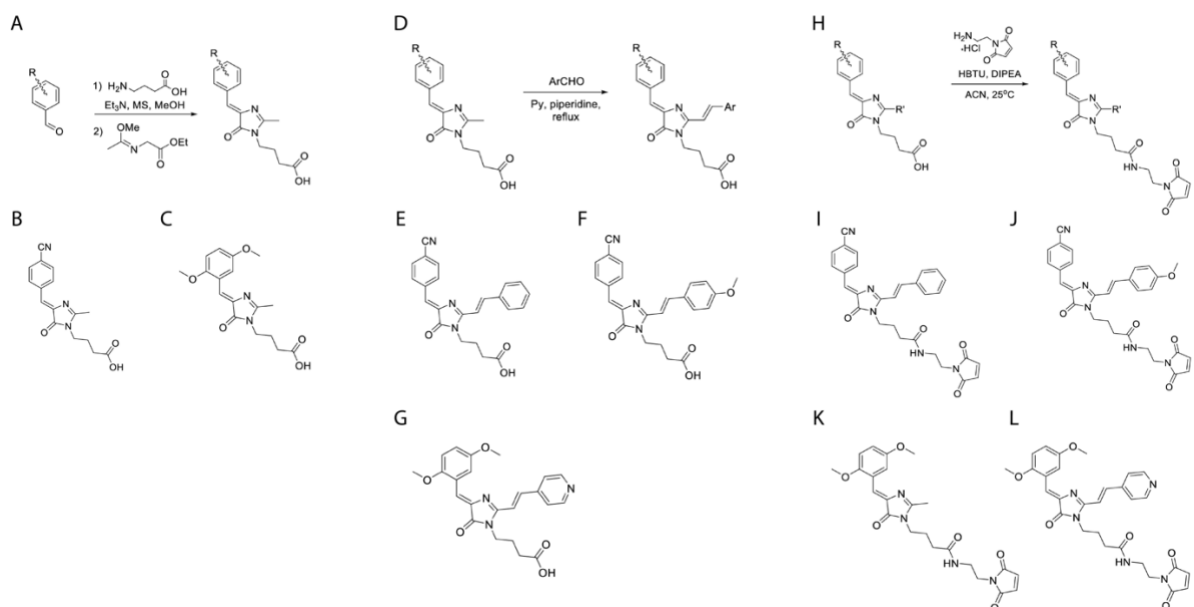

**Figure S5. Synthetic procedures of the dyes, related to STAR Methods.**

**A:** Preparation of (Z)-4-(4-benzylidene-2-methyl-5-oxo-4,5-dihydro-1H-imidazol-1-yl)butanoic acids. **B:** (Z)-4-(4-(4-cyanobenzylidene)-2-methyl-5-oxo-4,5-dihydro-1H-imidazol-1-yl)butanoic acid. **C:** DyeC acid. **D:** Preparation of 4-(4-((Z)-benzylidene)-2-((E)-styryl)-5-oxo-4,5-dihydro-1H-imidazol-1-yl)butanoic acids. **E:** DyeA acid. **F:** DyeB acid. **G:** DyeD acid. **H:** Preparation of 4-(4-((Z)-benzylidene)-5-oxo-4,5-dihydro-1H-imidazol-1-yl)-N-(2-(2,5-dioxo-2,5-dihydro-1H-pyrrol-1-yl)butanamide. **I:** DyeA maleimide. **J:** DyeB maleimide. **K:** DyeC maleimide. **L:** DyeD maleimide.

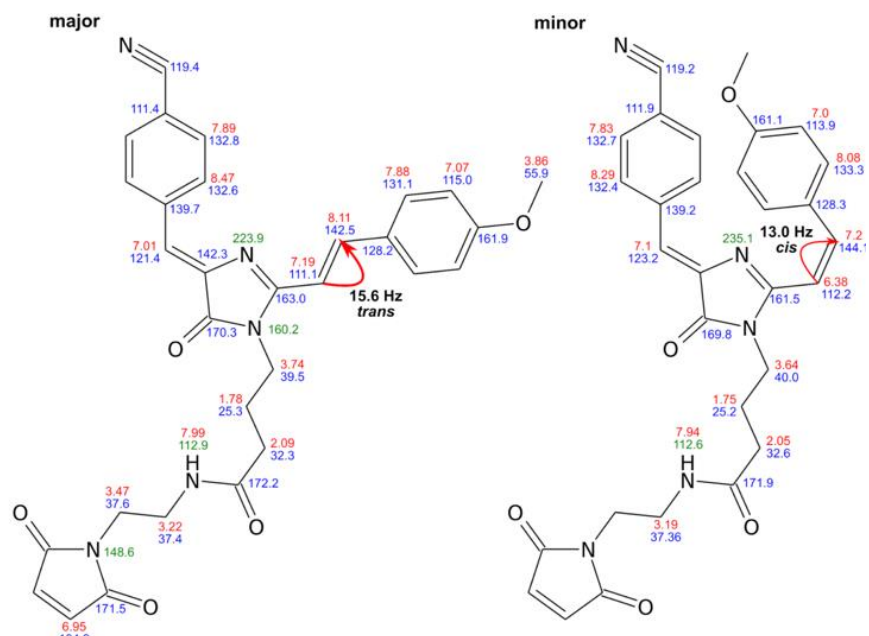

**Figure S6. Structures of DyeB maleimide isomers, related to STAR Methods.**

Chemical shift assignments are indicated by labels colored in red (<sup>1</sup>H), blue (<sup>13</sup>C), and green (<sup>15</sup>N). The red arrows denote the J-coupling between the double bond protons. Only the different chemical shifts in the minor state are indicated.

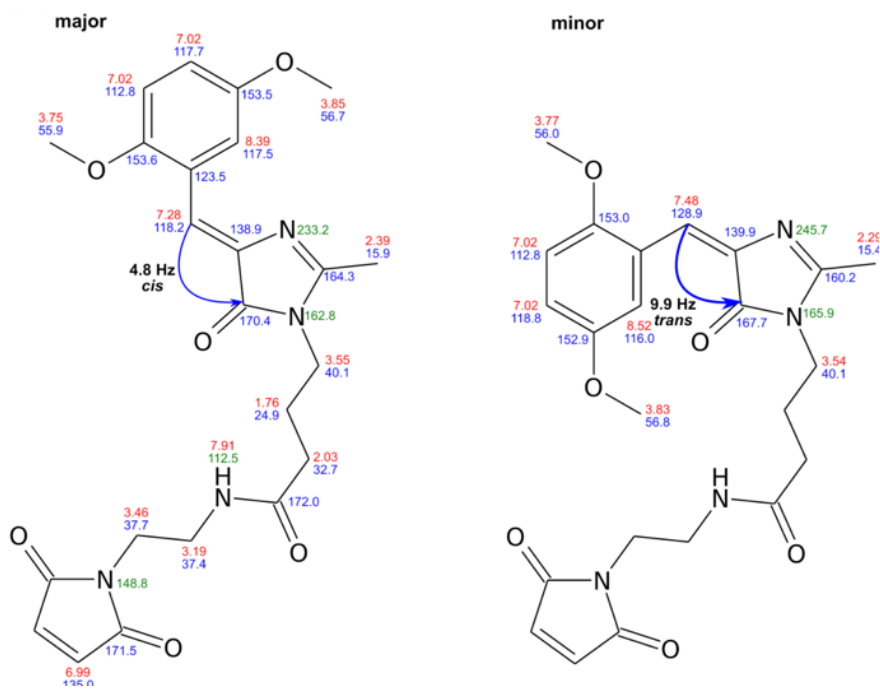

**Figure S7. Structures of DyeC maleimide isomers, related to STAR Methods.**

Chemical shift assignments are indicated by labels colored in red ( $^1\text{H}$ ), blue ( $^{13}\text{C}$ ), and green ( $^{15}\text{N}$ ). The red arrows denote the J-coupling between the double bond protons. Only the different chemical shifts in the minor state are indicated.



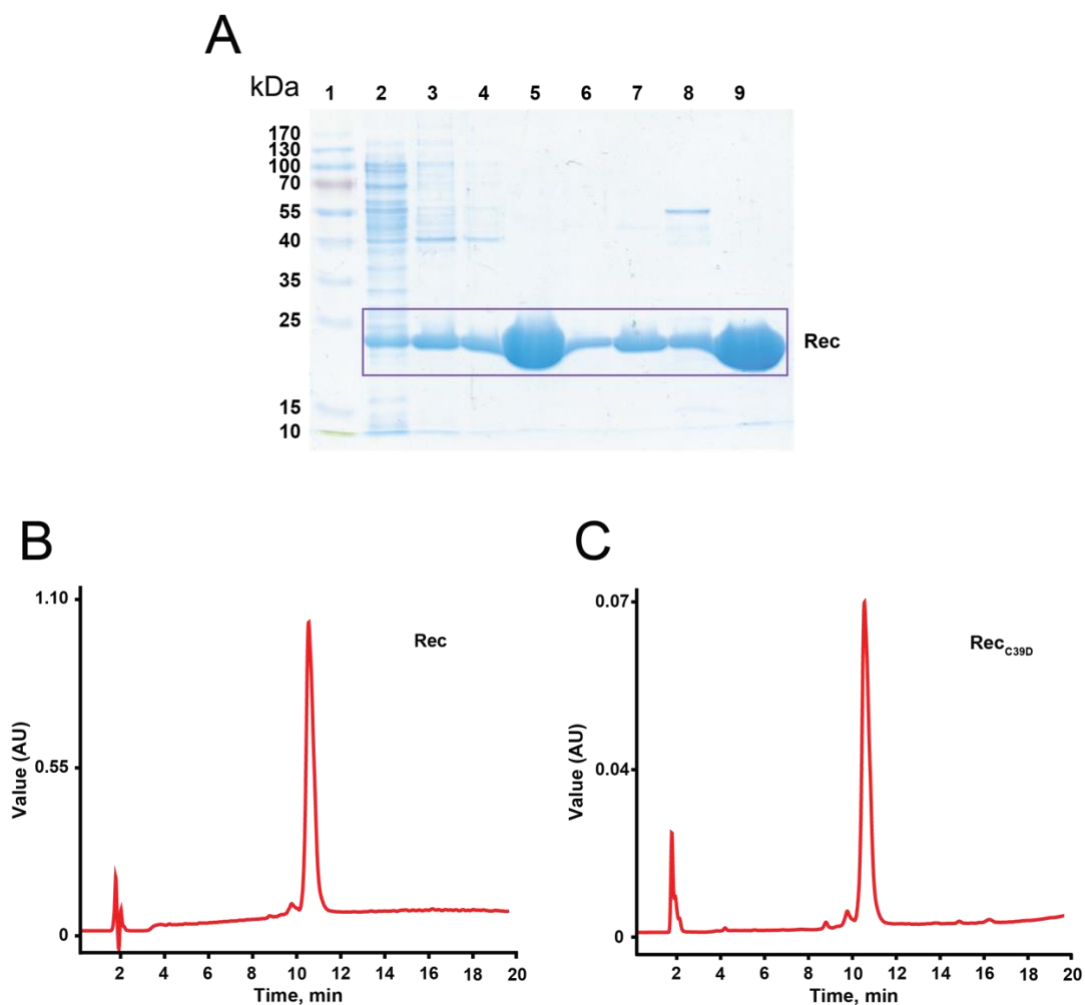

**Figure S8. SDS-PAGE (12.5%) and analytical HPLC of Rec and Rec<sub>C39D</sub>, related to STAR Methods.**  
**A:** SDS-PAGE (12.5%) of fractions obtained during purification of Rec and Rec<sub>C39D</sub>. Track 1 – Thermo Scientific™ PageRuler™ Prestained Protein Ladder; Track 2 – Bacterial lysate (Escherichia coli strain BL21-CodonPlus®(DE3)-RIL-X (Agilent), pBB131, pET11d-Rec); Track 3 – Chromatography on Phenyl Sepharose (Cytiva): eluate in 20 mM Tris-HCl, pH=7.5, 1 mM EGTA, 2 mM MgCl<sub>2</sub> and 1 mM DTT; Tracks 4-8 – Chromatography on HiTrap Q FF (Cytiva): fractions of gradient 0-1 M NaCl in 20 mM Tris-HCl, pH=7.5, 1 mM DTT; Track 5 – Selected fraction of the myristoylated wild type Rec; Track 9 – Selected fraction of myristoylated Rec<sub>C39D</sub>, purified exactly as described for the wild type Rec. The calculated Rec mass is 23.0 kDa. **B-C:** Analytical HPLC of Rec and Rec<sub>C39D</sub> in the acetonitrile-water system. Chromatograms of purified Rec **B** and Rec<sub>C39D</sub> **C** obtained using Breeze QS HPLC System (Waters) equipped with Luna C18 reversed-phase column (Phenomenex) in acetonitrile gradient. Retention time: non-myristoylated Rec/Rec<sub>C39D</sub> – 9.7 min, myristoylated Rec/Rec<sub>C39D</sub> – 10.7 min.

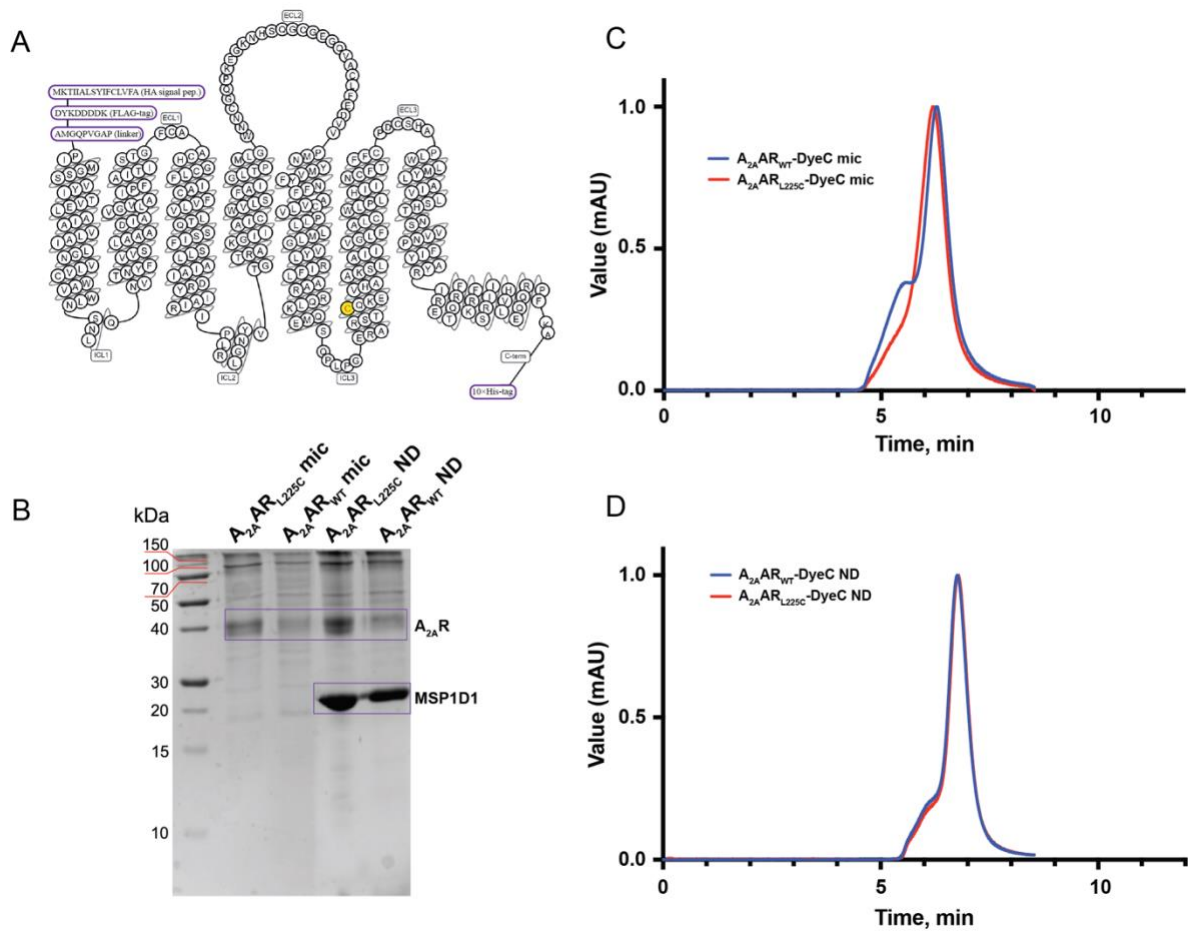

**Figure S9.  $A_{2A}AR$  constructions used in the work, and their SDS-PAGE and SEC in two different membrane-modeling systems, related to STAR Methods.**

**A:** A snake-plot diagram of the  $A_{2A}AR$  construct used in this work. L225<sup>6,27</sup> residue mutated to cysteine for the labeling is colored in yellow. The snake-plot was drawn using the GPCRdb.org website. **B:** SDS-PAGE of  $A_{2A}AR$ -DyeC samples.  $A_{2A}AR_{WT}$ -DyeC and  $A_{2A}AR_{L225C}$ -DyeC in micelles showed bands around 40 kDa (the calculated  $A_{2A}AR$  mass is 39.8 kDa),  $A_{2A}AR_{WT}$ -DyeC and  $A_{2A}AR_{L225C}$ -DyeC reconstituted in ND showed two bands: for  $A_{2A}AR$  around 40 kDa, and for MSP1D1 around 20 kDa (the calculated MSP1D1 mass is 24.7 kDa). **C:** Normalized analytical SEC of  $A_{2A}AR_{L225C}$ -DyeC and  $A_{2A}AR_{WT}$ -DyeC in micelles. **D:** Normalized analytical SEC of  $A_{2A}AR_{L225C}$ -DyeC and  $A_{2A}AR_{WT}$ -DyeC in ND. Chromatograms show mostly monomeric protein in both membrane-modeling systems.

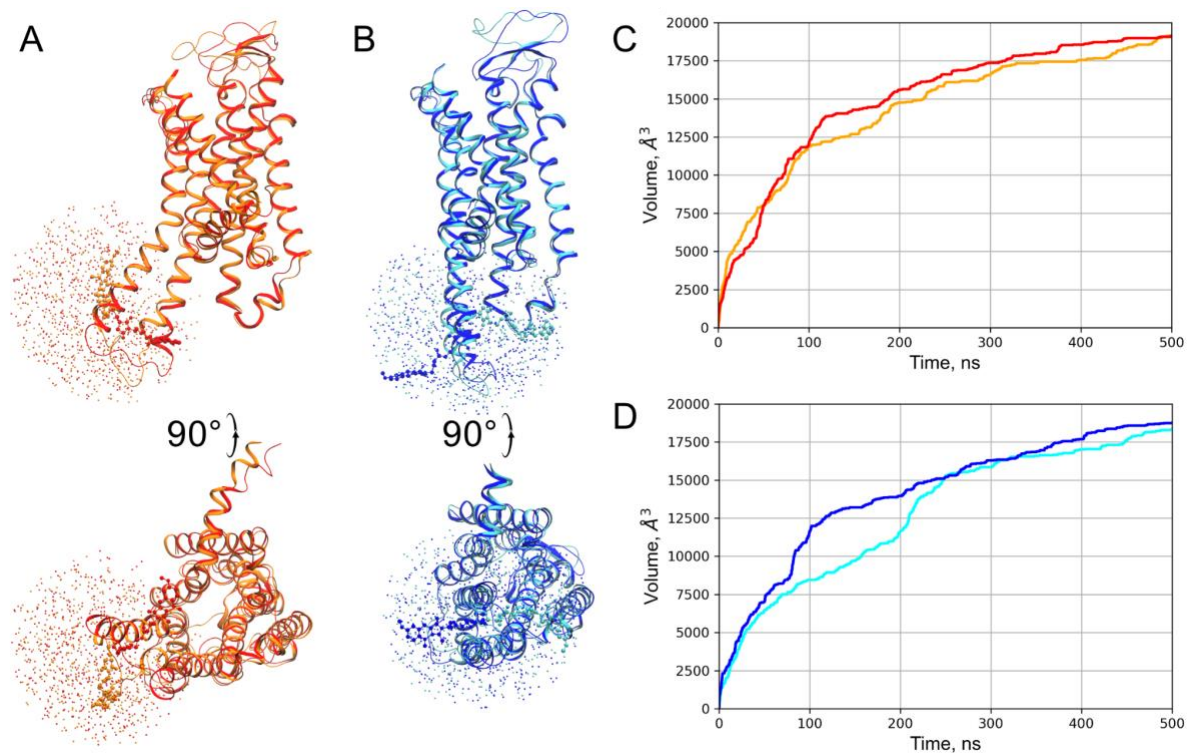

**Figure S10. Metadynamics convergence analysis, related to Figure 4.**

**A-B:** Positions of the dimethoxybenzene ring of the DyeC label throughout the metadynamics simulations shown every 1 ns. Each simulation was run for 500 ns. Results for two replicate simulations are shown for each receptor state, in orange and red for the active state, in cyan and blue - for the inactive state. Lipids and water are not shown for clarity. **C-D:** The cumulative volume explored by the fluorescent label plotted as a function of the simulation time for two replicate simulations of the active (panel C) and inactive (panel D) receptor states, colors match those in panels A-B.

**Table S1. Solvatochromic properties of maleimide compounds DyeA, DyeB, DyeC, and DyeD, related to Figure 1.**

|    | Solvent                         | logP* | Viscosity,<br>mPa·s* | DyeA                           |                               |           | DyeB                           |                               |           | DyeC                           |                               |           | DyeD                           |                               |           |
|----|---------------------------------|-------|----------------------|--------------------------------|-------------------------------|-----------|--------------------------------|-------------------------------|-----------|--------------------------------|-------------------------------|-----------|--------------------------------|-------------------------------|-----------|
|    |                                 |       |                      | $\lambda_{\text{ABS}}$ ,<br>nm | $\lambda_{\text{EM}}$ ,<br>nm | FQY,<br>% |
| 1  | Water                           | -1.38 | 0.9                  | 416                            | 557                           | 0.4       | 434                            | 575                           | 0.69      | ~393                           | ~570                          | 0.6       | ~450                           | ~643                          | N/D       |
| 2  | DMSO                            | -1.35 | 2.47                 | 431                            | 568                           | 1.9       | 444                            | 585                           | 2.16      | 399                            | 502                           | 17.8      | 461                            | 590                           | 4.1       |
| 3  | DMF                             | -1.01 | 0.8                  | 428                            | 563                           | 1.7       | 443                            | 580                           | 1.45      | 395                            | 498                           | 14.1      | 458                            | 581                           | 6.2       |
| 4  | MeOH                            | -0.77 | 0.54                 | 421                            | 559                           | 1.1       | 436                            | 575                           | 0.7       | 398                            | 539                           | 2.9       | 457                            | 600                           | 0.4       |
| 5  | ACN                             | -0.34 | 0.35                 | 424                            | 564                           | 1.5       | 437                            | 585                           | 0.82      | 394                            | 502                           | 7.3       | 452                            | 583                           | 4.4       |
| 6  | EtOH                            | -0.31 | 1.07                 | 424                            | 555                           | 1.4       | 440                            | 575                           | 1.11      | 398                            | 522                           | 4         | 459                            | 592                           | 1.2       |
| 7  | Dioxane                         | -0.27 | 1.2                  | 425                            | 554                           | 3.4       | 441                            | 570                           | 1.88      | 394                            | 477                           | 13.4      | 452                            | 564                           | 22.4      |
| 8  | Acetone                         | -0.24 | 0.32                 | 425                            | 563                           | 1.7       | 437                            | 580                           | 0.13      | 393                            | 485                           | 12.2      | 450                            | 576                           | 9.2       |
| 9  | PrOH-1                          | 0.25  | 2.26                 | 424                            | 559                           | 1.7       | N/M                            | N/M                           | N/M       | 398                            | 517                           | 3.8       | 460                            | 588                           | 2         |
| 10 | THF                             | 0.46  | 0.53                 | 427                            | 560                           | 2.3       | 442                            | 580                           | 1.5       | 393                            | 475                           | 10.2      | 451                            | 566                           | 19.8      |
| 11 | PY                              | 0.65  | 0.89                 | 431                            | 565                           | 2.6       | 446                            | 585                           | 2.43      | 398                            | 489                           | 11.2      | 463                            | 582                           | 11        |
| 12 | EtOAc                           | 0.73  | 0.42                 | 425                            | 554                           | 2.3       | 438                            | 575                           | 1.37      | 392                            | 476                           | 10.1      | 452                            | 564                           | 18.7      |
| 13 | BuOH                            | 0.88  | 2.57                 | N/M                            | N/M                           | N/M       | 442                            | 570                           | 1.66      | N/M                            | N/M                           | N/M       | N/M                            | N/M                           | N/M       |
| 14 | Et <sub>2</sub> O               | 0.89  | 0.24                 | 424                            | 554                           | 2.6       | 440                            | 570                           | 1.33      | 392                            | 466                           | 9.5       | 446                            | 560                           | 19.4      |
| 15 | CH <sub>2</sub> Cl <sub>2</sub> | 1.25  | 0.44                 | 425                            | 560                           | 2.2       | 441                            | 580                           | 1.28      | 397                            | 495                           | 4         | 457                            | 579                           | 7.9       |
| 16 | Pentanol-1                      | 1.51  | 3.5                  | N/M                            | N/M                           | N/M       | N/M                            | N/M                           | N/M       | 401                            | 507                           | 4.9       | N/M                            | N/M                           | N/M       |
| 17 | Toluene                         | 2.73  | 0.56                 | 429                            | 557                           | 3.8       | 443                            | 575                           | 1.97      | 396                            | 475                           | 9.7       | 456                            | 543                           | 21.4      |
| 18 | Decanol-1                       | 4.57  | 10.9                 | N/M                            | N/M                           | N/M       | N/M                            | N/M                           | N/M       | 401                            | 491                           | 9.4       | N/M                            | N/M                           | N/M       |
| 19 | Undecanol-1                     | 4.72  | 17.2                 | N/M                            | N/M                           | N/M       | 446                            | 570                           | 2.92      | 402                            | 486                           | 10.5      | N/M                            | N/M                           | N/M       |
| 20 | Octane                          | 5.18  | 0.52                 | 426                            | 550                           | 2.3       | 442                            | 565                           | 1.5       | 396                            | 458                           | 5.7       | 449                            | 560                           | 4.1       |
| 21 | Dodecane                        | 6.1   | 1.36                 | ~428                           | ~556                          | N/D       | 439                            | 565                           | 2.28      | 396                            | 458                           | 6.3       | ~451                           | ~567                          | N/D       |
| 22 | Pentadecane                     | 7.71  | 1.95                 | N/M                            | N/M                           | N/M       | 443                            | 565                           | 2.53      | 398                            | 462                           | 7.9       | N/M                            | N/M                           | N/M       |

\* – data from [pubchem.ncbi.nlm.nih.gov/compound](https://pubchem.ncbi.nlm.nih.gov/compound)

N/D – not determined due to low fluorescence

N/M – not measured

**Table S2. Integrated Intensity and  $I_{520}/I_{460}$  ratios for A<sub>2A</sub>AR<sub>L225C</sub>-DyeC with various ligands, related to Figure 3.**

| <b>Ligand</b> | <b><math>I_{520}/I_{460}</math></b> | <b>Integrated Intensity</b> |
|---------------|-------------------------------------|-----------------------------|
| Apo           | 1.76 ± 0.05 (n = 11)                | 2.64 ± 0.06 (n = 11)        |
| ZM241385      | 1.68 ± 0.04 (n = 9)                 | 2.62 ± 0.07 (n = 9)         |
| SCH58261      | 1.66 ± 0.04 (n = 9)                 | 2.66 ± 0.08 (n = 9)         |
| Adenosine     | 2.06 ± 0.03 (n = 10)                | 3.15 ± 0.08 (n = 10)        |
| NECA          | 1.99 ± 0.05 (n = 15)                | 3.16 ± 0.03 (n = 15)        |
| HMA           | 1.42 ± 0.03 (n = 9)                 | 3.03 ± 0.04 (n = 9)         |

Mean ± SD between repeated experiments are given. For each condition, protein from at least three different purification batches was used, the total numbers of technical repeats are given in brackets.

Table S3. Detection of GPCR structural changes with environmentally sensitive dyes, related to Figure 3.

| Dye     | Protein            | Labelling position                                                                                                   | Additional quencher | Mutation                                                                                                                                                                                                | Lipid Modelling System | Max. intensity change, % | Max. $\lambda_{EM}$ shift, nm | $\lambda_{EM}$ , nm | $\lambda_{EXC}$ , nm | $\epsilon$ , M <sup>-1</sup> . cm <sup>-1</sup> .10 <sup>3</sup> | Ref.       |
|---------|--------------------|----------------------------------------------------------------------------------------------------------------------|---------------------|---------------------------------------------------------------------------------------------------------------------------------------------------------------------------------------------------------|------------------------|--------------------------|-------------------------------|---------------------|----------------------|------------------------------------------------------------------|------------|
| IANBD   | $\beta_2$ AR       | undefined native Cys                                                                                                 | -                   | -                                                                                                                                                                                                       | DDM                    | 5                        | 0                             | 523                 | 481                  | 21 <sup>1-3</sup>                                                | 4-6        |
| FM      | $\beta_2$ AR       | C265 <sup>6.27</sup>                                                                                                 | -                   | -                                                                                                                                                                                                       | DDM                    | 15                       | N/A                           | 520                 | 490                  | 83 <sup>7</sup>                                                  | 8,9        |
| FM      | $\beta_2$ AR       | C265 <sup>6.27</sup>                                                                                                 | K224-oxyl-NHS       | All K to R/Q224 <sup>5.63</sup> K                                                                                                                                                                       | DDM                    | ~23                      | N/A                           | 520                 | 490                  | 83 <sup>10</sup>                                                 | 11         |
| TMR-5   | $\beta_2$ AR       | C265 <sup>6.27</sup>                                                                                                 | -                   | -                                                                                                                                                                                                       | DDM                    | ~20--60                  | N/A                           | 571                 | 541                  | 101 <sup>12</sup>                                                | 13-15      |
| APM     | $\beta_2$ AR       | C265 <sup>6.27</sup> or C271 <sup>6.33</sup>                                                                         | -                   | C378/406S or C378/406S, C265 <sup>6.27</sup> A                                                                                                                                                          | DDM                    | 0                        | <2                            | 625                 | 515                  | ~50 <sup>16</sup>                                                | 17         |
| Bimane  | $\beta_2$ AR       | C271 <sup>6.33</sup>                                                                                                 | I135W               | C77 <sup>2.48</sup> V, C265 <sup>6.27</sup> /378/406A C327 <sup>7.54</sup> S                                                                                                                            | DDM                    | ~50                      | 0                             | 458                 | 370                  | 5 <sup>18</sup>                                                  | 19         |
| Bimane  | $\beta_2$ AR       | C265 <sup>6.27</sup>                                                                                                 | -                   | 365-trun. or T4 lysozyme fusion                                                                                                                                                                         | DDM                    | <26                      | <8                            | 448                 | 350                  | 5 <sup>18</sup>                                                  | 20         |
| Bimane  | $\beta_2$ AR       | C265 <sup>6.27</sup>                                                                                                 | -                   | C77 <sup>2.48</sup> V, C327 <sup>7.54</sup> S, C378/406A                                                                                                                                                | ND                     | 50                       | 15                            | 450                 | 370                  | 5 <sup>18</sup>                                                  | 21         |
| TMR-5   | $\beta_2$ AR       | C265 <sup>6.27</sup>                                                                                                 | -                   | C77 <sup>2.48</sup> V, C327 <sup>7.54</sup> S, C378/406A                                                                                                                                                | DDM                    | 15                       | 4                             | 550                 | 515                  | 101 <sup>22</sup>                                                | 23         |
| Cy3     | $\beta_2$ AR       | C265 <sup>6.27</sup>                                                                                                 | -                   | E122 <sup>3.41</sup> W, res 245-249 removed, C327 <sup>7.54</sup> S, C341 <sup>8.59</sup> A, 348-trun                                                                                                   | ND                     | ~25                      | N/A                           | 570                 | 532                  | 150                                                              | 24         |
| Cy3     | $\beta_2$ AR       | C327 <sup>7.54</sup>                                                                                                 | -                   | E122 <sup>3.41</sup> W, res 245-249 removed, C265 <sup>6.27</sup> A, C341 <sup>8.59</sup> A, 348-trun                                                                                                   | ND                     | ~25                      | N/A                           | 570                 | 532                  | 150                                                              | 25         |
| Bimane  | GHSR               | C304 <sup>7.34</sup> or C146 <sup>3.55</sup>                                                                         | -                   | C146 <sup>3.55</sup> S or C304 <sup>7.34</sup> S                                                                                                                                                        | ND                     | ~55*                     | ~20                           | ~450                | 375                  | 5 <sup>18</sup>                                                  | 26         |
| Bimane  | Rhodopsin          | C141 <sup>3.56</sup> or C150 <sup>4.39</sup> or C228 <sup>5.63</sup> or C258 <sup>6.41</sup> or C250 <sup>6.33</sup> | KI                  | C140 <sup>3.55</sup> /316 <sup>8.53</sup> /322 <sup>8.59</sup> /323S and K141 <sup>3.56</sup> C or E150 <sup>4.39</sup> C or F228 <sup>5.63</sup> C or V258 <sup>6.41</sup> C or V250 <sup>6.33</sup> C | DDM                    | ~50                      | ~100                          | 460                 | 380                  | 5 <sup>18</sup>                                                  | 27         |
| Bimane  | Rhodopsin          | C227 <sup>5.62</sup> or C244 <sup>6.27</sup> or C250 <sup>6.33</sup> or C251 <sup>6.34</sup>                         | KI                  | C140 <sup>3.55</sup> /316 <sup>8.53</sup> /322 <sup>8.59</sup> /323S and V227 <sup>5.62</sup> C or Q244 <sup>6.27</sup> C or V258 <sup>6.41</sup> C or V250 <sup>6.33</sup> C                           | DDM                    | N/A                      | 12                            | ~460                | 380                  | 5 <sup>18</sup>                                                  | 28         |
| Bimane  | Parapinopsin       | C227 <sup>5.62</sup> or C244 <sup>6.27</sup> or C250 <sup>6.33</sup> or C251 <sup>6.34</sup>                         | KI                  | V138 <sup>3.53</sup> F, C140A, C316 <sup>6.40</sup> A, C323A and M227 <sup>5.62</sup> C or A244 <sup>6.27</sup> C or M258 <sup>6.40</sup> C or V250 <sup>6.33</sup> C                                   | DDM                    | N/A                      | 7                             | ~465                | 380                  | 5 <sup>18</sup>                                                  | 29         |
| IAEDANS | A <sub>2A</sub> AR | C231 <sup>6.33</sup>                                                                                                 | -                   | A231 <sup>6.33</sup> C                                                                                                                                                                                  | SMALP                  | 50**                     | 0                             | 460                 | 340                  | 6 <sup>30</sup>                                                  | 31         |
| Cy3     | A <sub>2A</sub> AR | A289 <sup>7.64</sup>                                                                                                 | -                   | N154Q, A289 <sup>7.64</sup> C, 316-trun                                                                                                                                                                 | ND                     | ~15                      | N/A                           | 570                 | 532                  | 150                                                              | 32         |
| DyeC    | A <sub>2A</sub> AR | C225 <sup>6.27</sup>                                                                                                 | -                   | L225 <sup>6.27</sup> C, 316-trun                                                                                                                                                                        | ND                     | 20                       | 5                             | 515                 | 410                  | 14                                                               | this study |

\* - opposite to other studies, the maximum effect was caused by inverse agonist but not agonist.

\*\* - opposite to other studies, the maximum effect was caused by antagonist but not agonist.

N/A - not available

## References

1. Gether, U., Lin, S., and Kobilka, B.K. (1995). Fluorescent Labeling of Purified  $\beta$ 2 Adrenergic Receptor: EVIDENCE FOR LIGAND-SPECIFIC CONFORMATIONAL CHANGES (\*). *J. Biol. Chem.* 270, 28268–28275.
2. Gether, U., Lin, S., Ghanouni, P., Ballesteros, J.A., Weinstein, H., and Kobilka, B.K. (1997). Agonists induce conformational changes in transmembrane domains III and VI of the beta2 adrenoceptor. *EMBO J.* 16, 6737–6747.
3. Ghanouni, P., Schambye, H., Seifert, R., Lee, T.W., Rasmussen, S.G.F., Gether, U., and Kobilka, B.K. (2000). The Effect of pH on  $\beta$ 2 Adrenoceptor Function: EVIDENCE FOR PROTONATION-DEPENDENT ACTIVATION \*. *J. Biol. Chem.* 275, 3121–3127.
4. Gether, U., Lin, S., and Kobilka, B.K. (1995). Fluorescent Labeling of Purified  $\beta$ 2 Adrenergic Receptor: EVIDENCE FOR LIGAND-SPECIFIC CONFORMATIONAL CHANGES (\*). *J. Biol. Chem.* 270, 28268–28275.
5. Gether, U., Lin, S., Ghanouni, P., Ballesteros, J.A., Weinstein, H., and Kobilka, B.K. (1997). Agonists induce conformational changes in transmembrane domains III and VI of the beta2 adrenoceptor. *EMBO J.* 16, 6737–6747.
6. Ghanouni, P., Schambye, H., Seifert, R., Lee, T.W., Rasmussen, S.G.F., Gether, U., and Kobilka, B.K. (2000). The Effect of pH on  $\beta$ 2 Adrenoceptor Function: EVIDENCE FOR PROTONATION-DEPENDENT ACTIVATION \*. *J. Biol. Chem.* 275, 3121–3127.
7. Ghanouni, P., Steenhuis, J.J., Farrens, D.L., and Kobilka, B.K. (2001). Agonist-induced conformational changes in the G-protein-coupling domain of the beta 2 adrenergic receptor. *Proc. Natl. Acad. Sci. U. S. A.* 98, 5997–6002.
8. Ghanouni, P., Steenhuis, J.J., Farrens, D.L., and Kobilka, B.K. (2001). Agonist-induced conformational changes in the G-protein-coupling domain of the beta 2 adrenergic receptor. *Proc. Natl. Acad. Sci. U. S. A.* 98, 5997–6002.
9. Ghanouni, P., Gryczynski, Z., Steenhuis, J.J., Lee, T.W., Farrens, D.L., Lakowicz, J.R., and Kobilka, B.K. (2001). Functionally different agonists induce distinct conformations in the G protein coupling domain of the beta 2 adrenergic receptor. *J. Biol. Chem.* 276, 24433–24436.
10. Ghanouni, P., Steenhuis, J.J., Farrens, D.L., and Kobilka, B.K. (2001). Agonist-induced conformational changes in the G-protein-coupling domain of the beta 2 adrenergic receptor. *Proc. Natl. Acad. Sci. U. S. A.* 98, 5997–6002.
11. Ghanouni, P., Steenhuis, J.J., Farrens, D.L., and Kobilka, B.K. (2001). Agonist-induced conformational changes in the G-protein-coupling domain of the beta 2 adrenergic receptor. *Proc. Natl. Acad. Sci. U. S. A.* 98, 5997–6002.
12. Tetramethylrhodamine-5-Maleimide, single isomer  
<https://www.thermofisher.com/order/catalog/product/T6027>.
13. Neumann, L., Wohland, T., Whelan, R.J., Zare, R.N., and Kobilka, B.K. (2002). Functional immobilization of a ligand-activated G-protein-coupled receptor. *Chembiochem* 3, 993–998.
14. Swaminath, G., Xiang, Y., Lee, T.W., Steenhuis, J., Parnot, C., and Kobilka, B.K. (2004). Sequential Binding of Agonists to the  $\beta$ 2 Adrenoceptor: KINETIC EVIDENCE FOR INTERMEDIATE CONFORMATIONAL STATES \*. *J. Biol. Chem.* 279, 686–691.
15. Swaminath, G., Deupi, X., Lee, T.W., Zhu, W., Thian, F.S., Kobilka, T.S., and Kobilka, B. (2005). Probing the beta2 adrenoceptor binding site with catechol reveals differences in binding and activation by agonists and partial agonists. *J. Biol. Chem.* 280, 22165–22171.
16. Cohen, B.E., Pralle, A., Yao, X., Swaminath, G., Gandhi, C.S., Jan, Y.N., Kobilka, B.K., Isacoff, E.Y., and Jan, L.Y. (2005). A fluorescent probe designed for studying protein conformational

- change. *Proc. Natl. Acad. Sci. U. S. A.* 102, 965–970.
17. Cohen, B.E., Pralle, A., Yao, X., Swaminath, G., Gandhi, C.S., Jan, Y.N., Kobilka, B.K., Isacoff, E.Y., and Jan, L.Y. (2005). A fluorescent probe designed for studying protein conformational change. *Proc. Natl. Acad. Sci. U. S. A.* 102, 965–970.
  18. Bromobimane Sigma-Aldrich. <https://www.sigmaaldrich.com/BE/en/product/sial/b4380>.
  19. Yao, X., Parnot, C., Deupi, X., Ratnala, V.R.P., Swaminath, G., Farrens, D., and Kobilka, B. (2006). Coupling ligand structure to specific conformational switches in the beta2-adrenoceptor. *Nat. Chem. Biol.* 2, 417–422.
  20. Rosenbaum, D.M., Cherezov, V., Hanson, M.A., Rasmussen, S.G.F., Thian, F.S., Kobilka, T.S., Choi, H.-J., Yao, X.-J., Weis, W.I., Stevens, R.C., et al. (2007). GPCR engineering yields high-resolution structural insights into beta2-adrenergic receptor function. *Science* 318, 1266–1273.
  21. Yao, X.J., Vélez Ruiz, G., Whorton, M.R., Rasmussen, S.G.F., DeVree, B.T., Deupi, X., Sunahara, R.K., and Kobilka, B. (2009). The effect of ligand efficacy on the formation and stability of a GPCR-G protein complex. *Proc. Natl. Acad. Sci. U. S. A.* 106, 9501–9506.
  22. Tetramethylrhodamine-5-Maleimide, single isomer <https://www.thermofisher.com/order/catalog/product/T6027>.
  23. Bockenhauer, S., Fürstenberg, A., Yao, X.J., Kobilka, B.K., and Moerner, W.E. (2011). Conformational dynamics of single G protein-coupled receptors in solution. *J. Phys. Chem. B* 115, 13328–13338.
  24. Lamichhane, R., Liu, J.J., Pljevaljic, G., White, K.L., van der Schans, E., Katritch, V., Stevens, R.C., Wüthrich, K., and Millar, D.P. (2015). Single-molecule view of basal activity and activation mechanisms of the G protein-coupled receptor  $\beta_2$ AR. *Proc. Natl. Acad. Sci. U. S. A.* 112, 14254–14259.
  25. Lamichhane, R., Liu, J.J., White, K.L., Katritch, V., Stevens, R.C., Wüthrich, K., and Millar, D.P. (2020). Biased Signaling of the G-Protein-Coupled Receptor  $\beta_2$ AR Is Governed by Conformational Exchange Kinetics. *Structure* 28, 371-377.e3.
  26. Mary, S., Damian, M., Louet, M., Floquet, N., Fehrentz, J.-A., Marie, J., Martinez, J., and Banères, J.-L. (2012). Ligands and signaling proteins govern the conformational landscape explored by a G protein-coupled receptor. *Proc. Natl. Acad. Sci. U. S. A.* 109, 8304–8309.
  27. Janz, J.M., and Farrens, D.L. (2004). Rhodopsin activation exposes a key hydrophobic binding site for the transducin alpha-subunit C terminus. *J. Biol. Chem.* 279, 29767–29773.
  28. Tsukamoto, H., Farrens, D.L., Koyanagi, M., and Terakita, A. (2009). The magnitude of the light-induced conformational change in different rhodopsins correlates with their ability to activate G proteins. *J. Biol. Chem.* 284, 20676–20683.
  29. Tsukamoto, H., Farrens, D.L., Koyanagi, M., and Terakita, A. (2009). The magnitude of the light-induced conformational change in different rhodopsins correlates with their ability to activate G proteins. *J. Biol. Chem.* 284, 20676–20683.
  30. Jordanova, R., Radoslavov, G., Fischer, P., Liebau, E., Walter, R.D., Bankov, I., and Boteva, R. (2005). Conformational and functional analysis of the lipid binding protein Ag-NPA-1 from the parasitic nematode *Ascaridia galli*. *FEBS J.* 272, 180–189.
  31. Routledge, S.J., Jamshad, M., Little, H.A., Lin, Y.-P., Simms, J., Thakker, A., Spickett, C.M., Bill, R.M., Dafforn, T.R., Poyner, D.R., et al. (2020). Ligand-induced conformational changes in a SMALP-encapsulated GPCR. *Biochim. Biophys. Acta Biomembr.* 1862, 183235.
  32. Wei, S., Thakur, N., Ray, A.P., Jin, B., Obeng, S., McCurdy, C.R., McMahon, L.R., Gutiérrez-de-Terán, H., Eddy, M.T., and Lamichhane, R. (2022). Slow conformational dynamics of the human A2A adenosine receptor are temporally ordered. *Structure* 30, 329-337.e5.
